# Supplementary material for: Genome-wide characterization of the β-1,3-glucanase gene family in Gossypium by comparative analysis
Source: PubMed Central journal article supplement (PMC4926093; doi:10.1038/srep29044), 2016-06-29
Supplement: srep29044-s1.pdf [file srep29044-s1.pdf]

**Genome-wide characterization of the  $\beta$ -1,3-glucanase gene family  
in *Gossypium* by comparative analysis**

**Xiaoyang Xu<sup>1</sup>, Yue Feng<sup>1</sup>, Shuai Fang<sup>1</sup>, Jun Xu<sup>1</sup>, Xinyu Wang<sup>2\*</sup>, Wangzhen  
Guo<sup>1\*</sup>**

**<sup>1</sup>State Key Laboratory of Crop Genetics & Germplasm Enhancement, Hybrid  
Cotton R & D Engineering Research Center, MOE, Nanjing Agricultural  
University, Nanjing 210095, China**

**<sup>2</sup>College of Life Science, Nanjing Agricultural University, Nanjing 210095, China**

**\* Correspondence and requests for materials should be addressed to W.Z.G or  
X.Y.W. (email: [moelab@njau.edu.cn](mailto:moelab@njau.edu.cn); [xywang@njau.edu.cn](mailto:xywang@njau.edu.cn))**

## Supplementary Figures and Tables

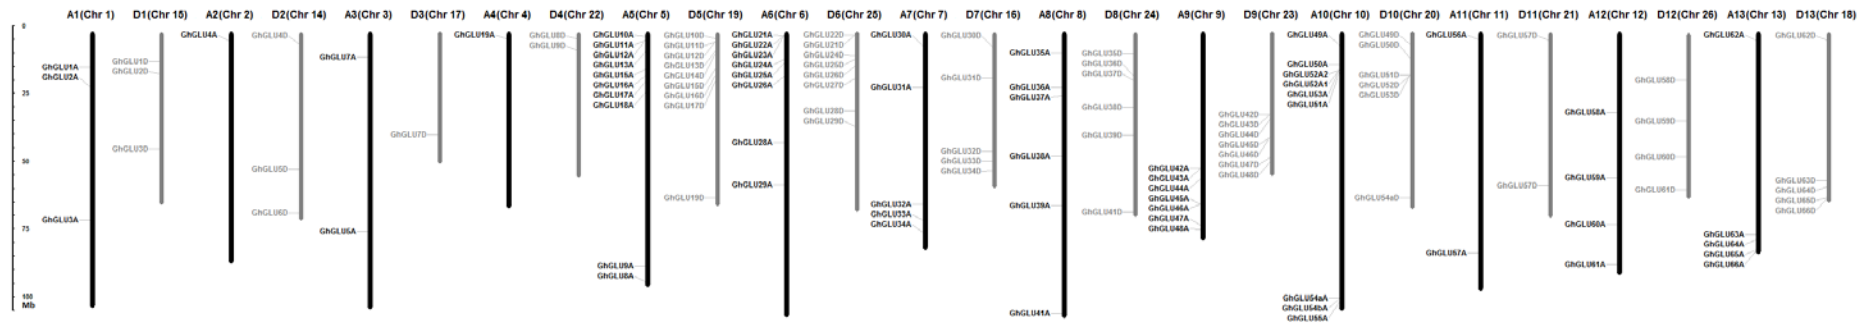

**Supplementary Figure 1. Chromosomal distribution of  $\beta$ -1,3-glucanase genes in *G. hirsutum*.** Genes in A subgenome chromosomes were in black, and in D subgenome chromosomes in gray.

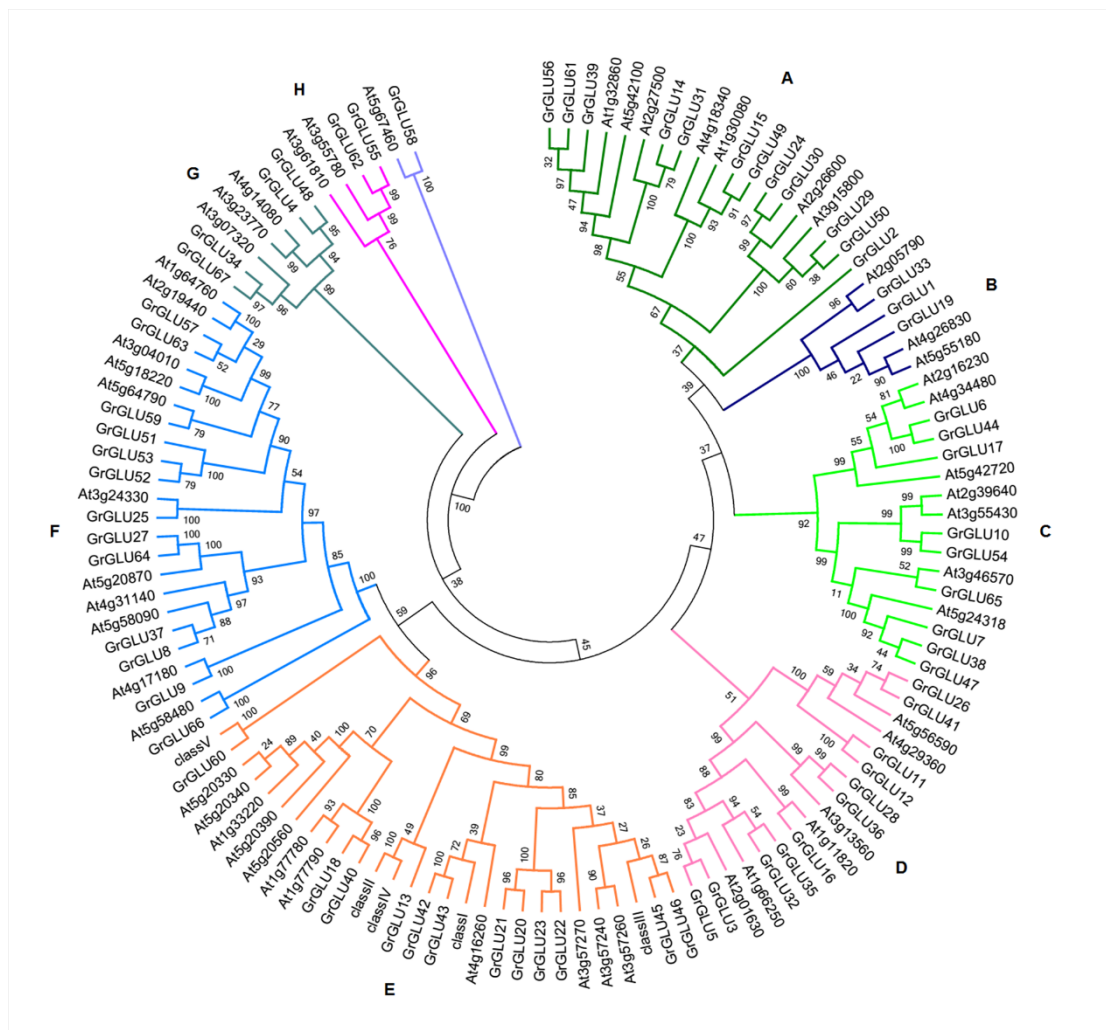

**Supplementary Figure 2. Phylogenetic relationships of  $\beta$ -1,3-glucanase gene family in *G. raimondii*, *A. thaliana* and tobacco.** Amino acid sequences of conserved glycosyl hydrolase family 17 domain were aligned using ClustalX and gaps and poorly aligned sections were removed. Phylogenetic tree was generated using the ML method under WAG model in MEGA v5.2, and the reliability of interior branches was assessed with 1000 bootstrap resamplings.



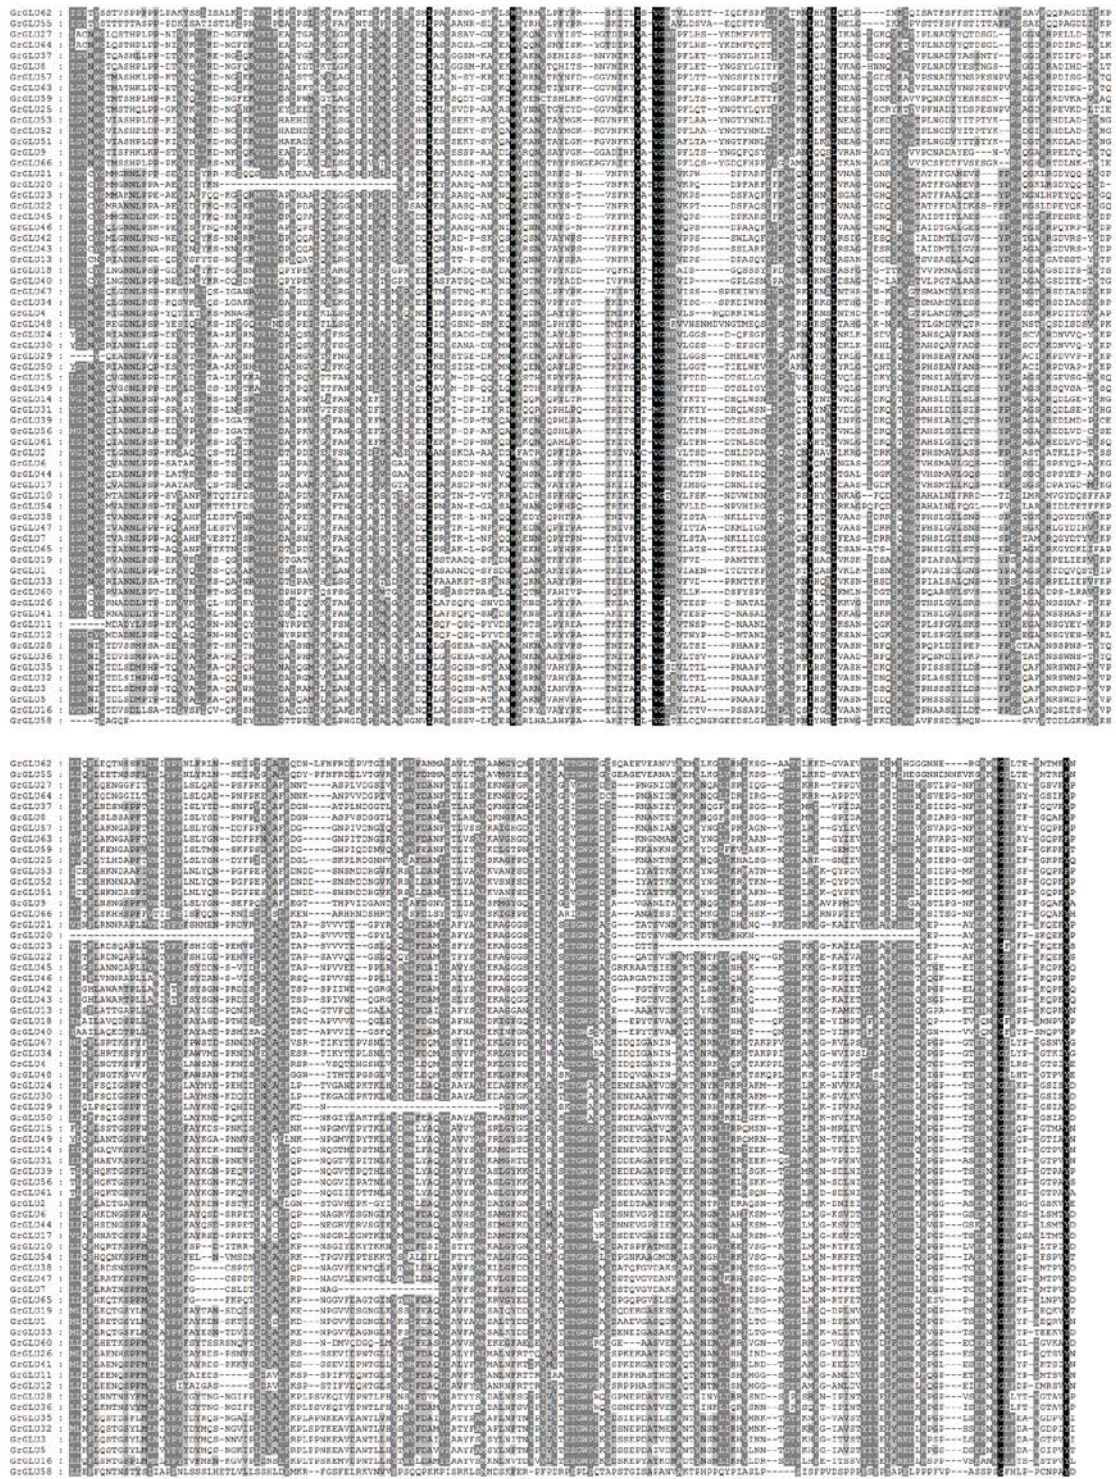

**Supplementary Figure 3. The multiple alignment of the conserved glycosyl hydrolase family 17 domain.**

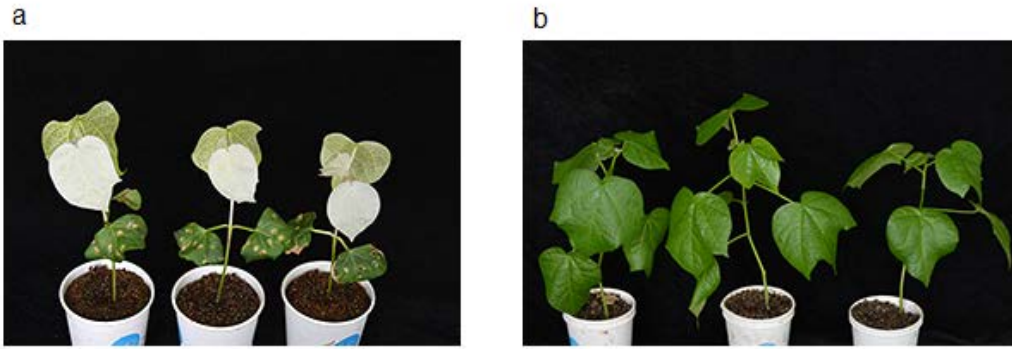

**Supplementary Figure 4. Phenotype of target gene-silenced plants.**

Photobleaching phenotype of *CLA1* silenced plants (a) and normal phenotype of no-inoculation control of *GLU42/43* silenced plants (b).



GLU42 : ATGGCTATCTTTTCTCATCATGAGGCTGCTATGCTCTTCTAGGGCTCTCTGCAAACTTGGATCCTACTGCTGCACA : 80  
 GLU43 : ATGGCTATCTTTTCTCATCATGAGGCTGCTATGCTCTTCTAGGGCTCTCTGCAAACTTGGATCCTACTGCTGCACA : 80  
 ATGGCTATCTTTTCT CATC ATGGCTGCTATGCTC TTCTAGGGCTC TC CTGCAAACTTGGATCCTACTG TGC CA

GLU42 : GATTGGTGTTTGCTATGGGATGCTTGGCAACAATCTCCCAAATCAAGGGAAGTCATCACTTTACAAATCAAACAACA : 160  
 GLU43 : GATTGGTGTTTGCTATGGGATGCTTGGCAACAATCTCCCAAATCAAGGGAAGTCATCACTTTACAAATCAAACAACA : 160  
 ATGGTGTTTGCTATGGGATGCTTGGCAACAATCTCCCAAAT CA GGAAGTCAT A CTTTACAAATCAAACAACA

GLU42 : TCCGCGGATGAGCTCTACGATCCAAATCAACAAGCATTACAAGCTCTTAGAGGCTCAACATTGAAGTAATTTAGGT : 240  
 GLU43 : TCCGCGGATGAGCTCTACGATCCAAATCAACAAGCATTACAAGCTCTTAGAGGCTCAACATTGAAGTAATTTAGGT : 240  
 TC GCGA TGAG CTCTACGATCCAAATCAACAAGCATTACAAGCTCTTAGAGGCTC AACATTGAAGTAAT TTAGGT

GLU42 : GTTCCCAATGATCAACTTCAAACCTCGCCACCCCTTCCAAGCACAATCATGGGTTCAATCAATGTTGTAGCTTATCTG : 320  
 GLU43 : GTTCCCAATGATCAACTTCAAACCTCGCCACCCCTTCCAAGCACAATCATGGGTTCAATCAATGTTGTAGCTTATCTG : 320  
 GTTCC AATGATCAACTTCAAACCT GC ACCCTTCCAAGCACAATCATGGGTTC ATCAATGTTGTAGC TA TG

GLU42 : GCCGAGCGTTCGGTTCGATACATTGCTGTGGGAACGAAGTCCCTCCATCATCTTGGTTAGCTCAATTGTTGGCCG : 400  
 GLU43 : GCCGAGCGTTCGGTTCGATACATTGCTGTGGGAACGAAGTCCCTCCATCATCTTGGTTAGCTCAATTGTTGGCCG : 400  
 GCC AG GT CCGTT CGATACATTGCTGT GGAACGAAGTCCCTCC TCATCTT TTAGCTC ATT GT TTGCC G

GLU42 : CCTTAGTGAATGATTTCAAAGCGGTTTCGATCGATCGGTTTGGAGAGTCAATCAAGGTCTCAATCGCCATGATATGAC : 480  
 GLU43 : CCTTAGTGAATGATTTCAAAGCGGTTTCGATCGGTTTGGAGAGTCAATCAAGGTCTCAATCGCCATGATATGAC : 480  
 CCTTAGTGAATGATTTCAA GCGGTTTCGATCG GTTTGGAGAGTCAATCAAGGTCTCAATCGCCAT GATATGAC

GLU42 : TTGATGGTGTCTCTATCCTCCATCGCTGGTGGCTTTTCGTTGGGAAGCTTAGGTCATATGAGCCCTATCATAGGCCA : 560  
 GLU43 : TTGATGGTGTCTCTATCCTCCATCGCTGGTGGCTTTTCGTTGGGAAGCTTAGGTCATATGAGCCCTATCATAGGCCA : 560  
 TTGAT GGTGTCTC TA CCTCC TCG CTGGTGC TTTTCGTTGGGA GTTAGGTCATAT T GACCCTATCATAGGCCA

GLU42 : CTTAGCATGGGCTAGAACACCCTGCTTGCACCAATTTACTACTTAGCTATCAGGCAATCCAAGGATATCTCAC : 640  
 GLU43 : CTTAGCATGGGCTAGAACACCCTGCTTGCACCAATTTACTACTTAGCTATCAGGCAATCCAAGGATATCTCAC : 640  
 CTTAGCATGGGCTAGAACACC TTGCTTGCACCAATTTA ACTACTT AGCTA TCAGGCAATCCAAGGGA ATCTCAC

GLU42 : TTCCATATGCTCTTTTCACTCCCCTTCCCTATTATATGGGATCAAGGACGTGGATACCAAAACCTATTGATGCAATG : 720  
 GLU43 : TTCCATATGCTCTTTTCACTCCCCTTCCCTATTATATGGGATCAAGGACGTGGATACCAAAACCTATTGATGCAATG : 720  
 TTCC ATGCTCTTTTCACT CCCCTTCCCTATT ATATGGGATCAAGGACGTGGATACCAAAACCTATT GATGCAATG

GLU42 : TTGGATTCATTATACTAGCTCTGAGAAAGCCGGCAAGGAGGCTGAAAGTTGTGGTATCAGAAAGGGATGGCCTTC : 800  
 GLU43 : TTGGATTCATTATACTAGCTCTGAGAAAGCCGGCAAGGAGGCTGAAAGTTGTGGTATCAGAAAGGGATGGCCTTC : 800  
 TTGGATTC TTATACTC GCTCT GAGAAAGCCGG CAAGG GG CT GAAAGTTGTGGTATCAGAAAG GGATGGCCTTC

GLU42 : AGCGGTGGGTTGGGACCTCGGTGATAACCGGCCACATATCTATCAACTTATATGACATGTCCAAAGGATACCC : 880  
 GLU43 : AGCGGTGGGTTGGGACCTCGGTGATAACCGGCCACATATCTATCAACTTATATGACATGTCCAAAGGATACCC : 880  
 AGC GGTGGTGGGACCTCGGT GATAACCG GCCAC ATATCTATC AACTT AT A ACATGTCCAA AGGATACCC

GLU42 : CAAAGAGGCCAGGAAAAGCATAGAGACATATTTGTTTGCCTTTTGGATGAAAACGAAACCGGTCAGACTAGAG : 960  
 GLU43 : CAAAGAGGCCAGGAAAAGCATAGAGACATATTTGTTTGCCTTTTGGATGAAAACGAAACCGGTCAGACTAGAG : 960  
 CAAAGAGGCCAGGAAAAGC ATAGAGACATATTTGTTTGC TTTTGGATGAAAAC GAAAC CGTCC AGACTAGAG

GLU42 : AGACACTTTGGGTTTTCACCAACAAGCAACCAAAATATCAGCTCCATTTTGGTGGGGAAGGCATTGGGATATTGC : 1040  
 GLU43 : AGACACTTTGGGTTTTCACCAACAAGCAACCAAAATATCAGCTCCATTTTGGTGGGGAAGGCATTGGGATATTGC : 1040  
 AGACACTTTGGGTT TTTTACCAACAAGCA CCAAAATATCAGCTCCATTTTGGTGG GGAAGGCATTGGGATATTGC

GLU42 : TTCTAGGAATATAATGAACTTTCCCTTAACTCTGATATGTAA : 1086  
 GLU43 : TTCTAGGAATATAATGAACTTTCCCTTAACTCTGATATGTAA : 1086  
 TTCT AGGAATATAATG AACCTTTCCCTTAA TCTGATATGTAA

**Supplementary Figure 5. Comparison of the nucleotide sequences of *GrGLU42* and *GrGLU43*.**

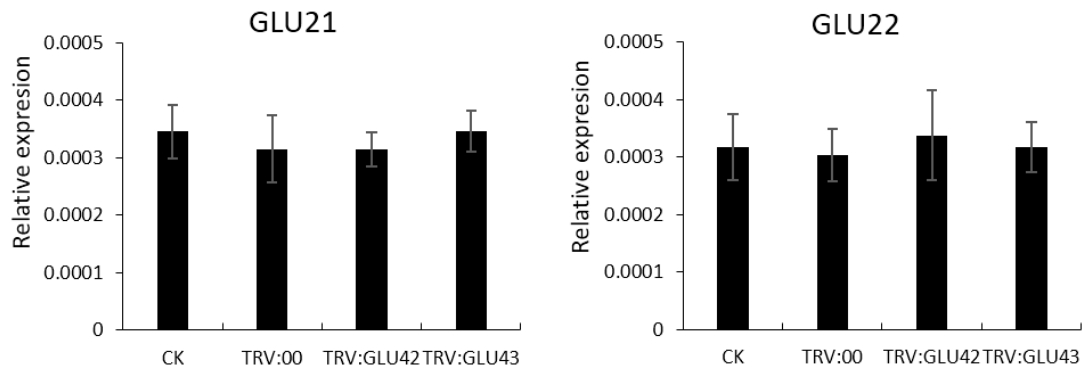

**Supplementary Figure 6. Expression of *GLU21/22* in control groups and *GLU42/43* silenced plants.**

**Supplementary Table 1.  $\beta$ -1,3-glucanase genes in *Gossypium*.**

| <i>G.arboreum</i> | Locus name     | <i>G. hirsutum</i><br>A subgenome | Locus name  | <i>G. barbadense</i><br>A subgenome | Locus name                                 | <i>G.raimondii</i> | Locus name       | <i>G. hirsutum</i><br>D subgenome | Locus name  | <i>G. barbadense</i><br>D subgenome | Locus name                                   |
|-------------------|----------------|-----------------------------------|-------------|-------------------------------------|--------------------------------------------|--------------------|------------------|-----------------------------------|-------------|-------------------------------------|----------------------------------------------|
| GaGLU1            | Cotton_A_04825 | GhGLU1A                           | Gh_A01G0649 | GbGLU1A1<br>GbGLU1A2                | Gbscaffold1521.13.0<br>Gbscaffold1521.12.0 | GrGLU1             | Gorai.002G092600 | GhGLU1D                           | Gh_D01G0668 | GbGLU1D                             | Gbscaffold6144.12.0                          |
| GaGLU2            | Cotton_A_12674 | GhGLU2A                           | Gh_A01G0828 |                                     |                                            | GrGLU2             | Gorai.002G114200 | GhGLU2D                           | Gh_D01G0856 | GbGLU2D                             | Gbscaffold12440.10.0                         |
| GaGLU3            | Cotton_A_36373 | GhGLU3A                           | Gh_A01G1227 | GbGLU3A                             | Gbscaffold620.3.0                          | GrGLU3             | Gorai.002G174100 | GhGLU3D                           | Gh_D01G1411 | GbGLU3D                             | Gbscaffold24022.4.0                          |
| GaGLU4            | Cotton_A_25304 | GhGLU4A                           | Gh_A02G0175 | GbGLU4A                             | Gbscaffold1889.1.0                         | GrGLU4             | Gorai.005G026800 | GhGLU4D                           | Gh_D02G0239 | GbGLU4D                             | Gbscaffold41178.2.0                          |
| GaGLU5            | Cotton_A_29885 | GhGLU5A                           | Gh_A03G1035 | GbGLU5A                             | Gbscaffold14449.2.0                        | GrGLU5             | Gorai.005G159100 | GhGLU5D                           | Gh_D02G1427 | GbGLU5D                             | Gbscaffold9656.3.0                           |
| GaGLU6            | Cotton_A_00745 | GhGLU6A                           | Gh_A03G2183 | GbGLU6A1<br>GbGLU6A2                | Gbscaffold5424.6.0<br>Gbscaffold5424.5.0   | GrGLU6             | Gorai.005G243100 | GhGLU6D                           | Gh_D02G2139 | GbGLU6D                             | Gbscaffold20579.3.0                          |
| GaGLU7            | Cotton_A_20326 | GhGLU7A                           | Gh_A03G0416 | GbGLU7A                             | Gbscaffold69.15.0                          | GrGLU7             | Gorai.003G121900 | GhGLU7D                           | Gh_D03G1098 | GbGLU7D                             | Gbscaffold7000.1.0                           |
| GaGLU8            | Cotton_A_06068 | GhGLU8A                           | Gh_A05G3538 | GbGLU8A                             | Gbscaffold2336.19.0                        | GrGLU8             | Gorai.012G009200 | GhGLU8D                           | Gh_D04G0069 | GbGLU8D                             | Gbscaffold22319.4.0                          |
| GaGLU9            | Cotton_A_17576 | GhGLU9A                           | Gh_A05G3256 | GbGLU9A                             | Gbscaffold2048.19.0                        | GrGLU9             | Gorai.012G043900 | GhGLU9D                           | Gh_D04G0353 | GbGLU9D                             | Gbscaffold13974.24.0                         |
| GaGLU10           | Cotton_A_11521 | GhGLU10A                          | Gh_A05G0033 | GbGLU10A1<br>GbGLU10A2              | Gbscaffold5097.11.0<br>Gbscaffold5097.12.0 | GrGLU10            | Gorai.009G010800 | GhGLU10D                          | Gh_D05G0088 | GbGLU10D                            | Gbscaffold8119.3.0                           |
| GaGLU11           | Cotton_A_09400 | GhGLU11A                          | Gh_A05G0189 | GbGLU11A                            | Gbscaffold26219.2.0                        | GrGLU11            | Gorai.009G028200 | GhGLU11D                          | Gh_D05G0263 | GbGLU11D1<br>GbGLU11D2              | Gbscaffold6004.3.0<br>Gbscaffold6004.4.0     |
| GaGLU12           | Cotton_A_09399 | GhGLU12A                          | Gh_A05G0190 | GbGLU12A1<br>GbGLU12A2              | Gbscaffold26219.4.0<br>Gbscaffold26219.3.0 | GrGLU12            | Gorai.009G028300 | GhGLU12D                          | Gh_D05G0264 | GbGLU12D1<br>GbGLU12D2              | Gbscaffold6004.6.0<br>Gbscaffold6004.5.0     |
| GaGLU13           | Cotton_A_01055 | GhGLU13A                          | Gh_A05G0579 | GbGLU13A                            | Gbscaffold648.10.0                         | GrGLU13            | Gorai.009G074100 | GhGLU13D                          | Gh_D05G0709 | GbGLU13D                            | Gbscaffold13680.4.0                          |
| GaGLU14           | Cotton_A_13878 |                                   |             | GbGLU14A                            | Gbscaffold17791.1.0                        | GrGLU14            | Gorai.009G085300 | GhGLU14D                          | Gh_D05G0815 | GbGLU14D1<br>GbGLU14D2              | Gbscaffold4759.40.0<br>Gbscaffold4759.39.0   |
| GaGLU15           | Cotton_A_12341 | GhGLU15A                          | Gh_A05G1246 | GbGLU15A                            | Gbscaffold2710.8.0                         | GrGLU15            | Gorai.009G154800 | GhGLU15D                          | Gh_D05G1409 | GbGLU15D1<br>GbGLU15D2              | Gbscaffold33334.8.0<br>Gbscaffold33334.7.0   |
| GaGLU16           | Cotton_A_04676 | GhGLU16A                          | Gh_A05G1462 | GbGLU16A                            | Gbscaffold497.45.0                         | GrGLU16            | Gorai.009G179400 | GhGLU16D                          | Gh_D05G1636 | GbGLU16D                            | Gbscaffold10982.20.0                         |
| GaGLU17           | Cotton_A_13748 | GhGLU17A                          | Gh_A05G1670 | GbGLU17A                            | Gbscaffold15959.26.0                       | GrGLU17            | Gorai.009G202900 | GhGLU17D                          | Gh_D05G1854 | GbGLU17D                            | Gbscaffold803.34.0                           |
| GaGLU18           | Cotton_A_16131 | GhGLU18A                          | Gh_A05G1996 | GbGLU18A                            | Gbscaffold999.18.0                         | GrGLU18            | Gorai.009G242500 | GhGLU18D                          | Gh_D05G3800 | GbGLU18D                            | Gbscaffold43820.2.0                          |
| GaGLU19           | Cotton_A_12137 | GhGLU19A                          | Gh_A04G0109 | GbGLU19A                            | Gbscaffold1811.1.0                         | GrGLU19            | Gorai.009G442700 | GhGLU19D                          | Gh_D05G3612 | GbGLU19D                            | Gbscaffold13331.11.0                         |
| GaGLU20           | Cotton_A_18246 |                                   |             |                                     |                                            | GrGLU20            | Gorai.010G003400 |                                   |             | GbGLU20D1<br>GbGLU20D2              | Gbscaffold17324.19.0<br>Gbscaffold17324.18.0 |
| GaGLU21           | Cotton_A_18247 | GhGLU21A                          | Gh_A06G0035 | GbGLU21A                            | Gbscaffold7493.26.0                        | GrGLU21            | Gorai.010G003500 | GhGLU21D                          | Gh_D06G2278 | GbGLU21D                            | Gbscaffold17324.17.0                         |
| GaGLU22           | Cotton_A_18248 | GhGLU22A                          | Gh_A06G0036 | GbGLU22A                            | Gbscaffold7493.27.0                        | GrGLU22            | Gorai.010G003600 | GhGLU22D                          | Gh_D06G2277 | GbGLU22D                            | Gbscaffold17324.16.0                         |



|         |                |          |             |           |                      |         |                  |          |                 |           |                      |
|---------|----------------|----------|-------------|-----------|----------------------|---------|------------------|----------|-----------------|-----------|----------------------|
| GaGLU23 | Cotton_A_18249 | GhGLU23A | Gh_A06G0037 | GbGLU23A  | Gbscaffold7493.28.0  | GrGLU23 | Gorai.010G003700 |          |                 | GbGLU23D  | Gbscaffold17324.15.0 |
| GaGLU24 | Cotton_A_17417 | GhGLU24A | Gh_A06G0470 | GbGLU24A  | Gbscaffold4129.4.0   | GrGLU24 | Gorai.010G062700 | GhGLU24D | Gh_D06G0512     |           |                      |
| GaGLU25 | Cotton_A_20448 | GhGLU25A | Gh_A06G0517 | GbGLU25A  | Gbscaffold3655.6.0   | GrGLU25 | Gorai.010G068800 | GhGLU25D | Gh_D06G0574     | GbGLU25D1 | Gbscaffold11193.8.0  |
|         |                |          |             |           |                      |         |                  |          |                 | GbGLU25D2 | Gbscaffold11193.9.0  |
| GaGLU26 | Cotton_A_18097 | GhGLU26A | Gh_A06G0594 | GbGLU26A  | Gbscaffold2850.13.0  | GrGLU26 | Gorai.010G078300 | GhGLU26D | Gh_D06G0675     | GbGLU26D  | Gbscaffold18465.3.0  |
| GaGLU27 | Cotton_A_36325 | GhGLU27A | Gh_A06G1946 | GbGLU27A1 | Gbscaffold9289.2.0   | GrGLU27 | Gorai.010G094500 | GhGLU27D | Gh_D06G0862     | GbGLU27D1 | Gbscaffold6999.20.0  |
|         |                |          |             | GbGLU27A2 | Gbscaffold9289.1.0   |         |                  |          |                 | GbGLU27D2 | Gbscaffold6999.23.0  |
| GaGLU28 | Cotton_A_26811 | GhGLU28A | Gh_A06G0935 |           |                      | GrGLU28 | Gorai.010G126400 | GhGLU28D | Gh_D06G1164     | GbGLU28D  | Gbscaffold10174.1.0  |
| GaGLU29 | Cotton_A_38959 | GhGLU29A | Gh_A06G1032 |           |                      | GrGLU29 | Gorai.010G137300 | GhGLU29D | Gh_D06G1248     |           |                      |
| GaGLU30 | Cotton_A_03523 | GhGLU30A | Gh_A07G0310 | GbGLU30A1 | Gbscaffold7622.14.0  | GrGLU30 | Gorai.001G043100 | GhGLU30D | Gh_D07G0367     |           | Gbscaffold80.10.0    |
|         |                |          |             | GbGLU30A2 | Gbscaffold7622.13.0  |         |                  |          |                 |           |                      |
| GaGLU31 | Cotton_A_09592 | GhGLU31A | Gh_A07G1004 | GbGLU31A  | Gbscaffold21225.4.0  | GrGLU31 | Gorai.001G122300 | GhGLU31D | Gh_D07G1081     | GbGLU31D1 | Gbscaffold2759.2.0   |
|         |                |          |             |           |                      |         |                  |          |                 | GbGLU31D2 | Gbscaffold2759.3.0   |
| GaGLU32 | Cotton_A_39010 | GhGLU32A | Gh_A07G1597 | GbGLU32A  | Gbscaffold33713.1.0  | GrGLU32 | Gorai.001G204900 | GhGLU32D | Gh_D07G1793     | GbGLU32D  | Gbscaffold12719.9.0  |
| GaGLU33 | Cotton_A_18690 | GhGLU33A | Gh_A07G1684 | GbGLU33A1 | Gbscaffold31935.1.0  | GrGLU33 | Gorai.001G216900 | GhGLU33D | Gh_D07G1895     | GbGLU33D  | Gbscaffold8463.10.0  |
|         |                |          |             | GbGLU33A2 | Gbscaffold31935.2.0  |         |                  |          |                 |           |                      |
| GaGLU34 | Cotton_A_15198 | GhGLU34A | Gh_A07G1802 | GbGLU34A  | Gbscaffold7792.2.0   | GrGLU34 | Gorai.001G230200 | GhGLU34D | Gh_D07G2007     | GbGLU34D  | Gbscaffold10953.5.0  |
| GaGLU35 | Cotton_A_03296 | GhGLU35A | Gh_A08G0480 | GbGLU35A  | Gbscaffold6441.5.0   | GrGLU35 | Gorai.004G064200 | GhGLU35D | Gh_D08G0563     | GbGLU35D  | Gbscaffold400.15.0   |
| GaGLU36 | Cotton_A_24254 | GhGLU36A | Gh_A08G0722 | GbGLU36A  | Gbscaffold2932.3.0   | GrGLU36 | Gorai.004G094500 | GhGLU36D | Gh_D08G0842     | GbGLU36D  | Gbscaffold7397.3.0   |
| GaGLU37 | Cotton_A_35998 | GhGLU37A | Gh_A08G0738 | GbGLU37A  | Gbscaffold3293.1.0   | GrGLU37 | Gorai.004G097500 | GhGLU37D | Gh_D08G0877     | GbGLU37D  | Gbscaffold3546.10.0  |
| GaGLU38 | Cotton_A_36462 | GhGLU38A | Gh_A08G0841 | GbGLU38A  | Gbscaffold4788.2.0   | GrGLU38 | Gorai.004G111800 | GhGLU38D | Gh_D08G1019     | GbGLU38D1 | Gbscaffold3463.6.0   |
|         |                |          |             |           |                      |         |                  |          |                 | GbGLU38D2 | Gbscaffold3463.7.0   |
| GaGLU39 | Cotton_A_34954 | GhGLU39A | Gh_A08G0958 | GbGLU39A1 | Gbscaffold866.5.0    | GrGLU39 | Gorai.004G128800 | GhGLU39D | Gh_D08G1168     | GbGLU39D1 | Gbscaffold2085.8.0   |
|         |                |          |             | GbGLU39A2 | Gbscaffold866.9.0    |         |                  |          |                 | GbGLU39D2 | Gbscaffold2085.10.0  |
|         |                |          |             | GbGLU39A3 | Gbscaffold866.7.0    |         |                  |          |                 |           |                      |
| GaGLU40 | Cotton_A_05737 |          |             | GbGLU40A1 | Gbscaffold17750.12.0 | GrGLU40 | Gorai.004G257700 | GhGLU40D | Gh_Sca008361G02 | GbGLU40D  | Gbscaffold7703.10.0  |
|         |                |          |             | GbGLU40A2 | Gbscaffold17750.11.0 |         |                  |          |                 |           |                      |
| GaGLU41 | Cotton_A_14534 | GhGLU41A | Gh_A08G2169 | GbGLU41A  | Gbscaffold9174.22.0  | GrGLU41 | Gorai.004G282300 | GhGLU41D | Gh_D08G2535     | GbGLU41D  | Gbscaffold18520.31.0 |
| GaGLU42 | Cotton_A_16539 | GhGLU42A | Gh_A09G0635 | GbGLU42A  | Gbscaffold7561.11.0  | GrGLU42 | Gorai.006G079400 | GhGLU42D | Gh_D09G0636     | GbGLU42D1 | Gbscaffold17082.1.0  |
|         |                |          |             |           |                      |         |                  |          |                 | GbGLU42D2 | Gbscaffold17082.2.0  |
| GaGLU43 | Cotton_A_16537 | GhGLU43A | Gh_A09G0636 | GbGLU43A1 | Gbscaffold7561.13.0  | GrGLU43 | Gorai.006G079600 | GhGLU43D | Gh_D09G0637     |           |                      |
|         |                |          |             | GbGLU43A2 | Gbscaffold7561.14.0  |         |                  |          |                 |           |                      |
|         |                |          |             | GbGLU43A3 | Gbscaffold7561.15.0  |         |                  |          |                 |           |                      |
| GaGLU44 | Cotton_A_35086 | GhGLU44A | Gh_A09G0725 | GbGLU44A  | Gbscaffold1825.2.0   | GrGLU44 | Gorai.006G090600 | GhGLU44D | Gh_D09G0724     | GbGLU44D  | Gbscaffold1825.2.0   |

|          |                |           |             |            |                      |         |                  |           |             |           |                      |
|----------|----------------|-----------|-------------|------------|----------------------|---------|------------------|-----------|-------------|-----------|----------------------|
| GaGLU45  | Cotton_A_01892 | GhGLU45A  | Gh_A09G1126 |            |                      | GrGLU45 | Gorai.006G134600 | GhGLU45D  | Gh_D09G1130 | GbGLU45D1 | Gbscaffold33965.9.0  |
|          |                |           |             |            |                      |         |                  |           |             | GbGLU45D2 | Gbscaffold33965.8.0  |
| GaGLU46  | Cotton_A_01893 | GhGLU46A  | Gh_A09G1127 | GbGLU46A   | Gbscaffold33965.10.0 | GrGLU46 | Gorai.006G134700 | GhGLU46D  | Gh_D09G1131 | GbGLU46D  | Gbscaffold8357.31.0  |
| GaGLU47  | Cotton_A_08100 | GhGLU47A  | Gh_A09G1662 | GbGLU47A   | Gbscaffold13148.1.0  | GrGLU47 | Gorai.006G202300 | GhGLU47D  | Gh_D09G1756 | GbGLU47D  | Gbscaffold2786.5.0   |
| GaGLU48  | Cotton_A_07399 | GhGLU48A  | Gh_A09G1852 | GbGLU48A   | Gbscaffold3157.7.0   | GrGLU48 | Gorai.006G224700 | GhGLU48D  | Gh_D09G1972 | GbGLU48D1 | Gbscaffold5795.35.0  |
|          |                |           |             |            |                      |         |                  |           |             | GbGLU48D2 | Gbscaffold5795.37.0  |
| GaGLU49  | Cotton_A_02897 | GhGLU49A  | Gh_A10G0385 | GbGLU49A   | Gbscaffold7446.7.0   | GrGLU49 | Gorai.011G044700 | GhGLU49D  | Gh_D10G0396 | GbGLU49D  | Gbscaffold24196.2.0  |
| GaGLU50  | Cotton_A_11774 | GhGLU50A  | Gh_A10G0654 | GbGLU50A1  | Gbscaffold5654.2.0   | GrGLU50 | Gorai.011G084000 | GhGLU50D  | Gh_D10G0738 | GbGLU50D  | Gbscaffold7228.4.0   |
|          |                |           |             | GbGLU50A2  | Gbscaffold11052.10.0 |         |                  |           |             |           |                      |
| GaGLU51  | Cotton_A_31039 | GhGLU51A  | Gh_A10G0751 | GbGLU51A   | Gbscaffold7121.1.0   | GrGLU51 | Gorai.011G114400 | GhGLU51D  | Gh_D10G1013 | GbGLU51D  | Gbscaffold6226.6.0   |
| GaGLU52  | Cotton_A_25072 | GhGLU52A1 | Gh_A10G0737 |            |                      | GrGLU52 | Gorai.011G114500 | GhGLU52D  | Gh_D10G1014 | GbGLU52D1 | Gbscaffold16259.1.0  |
|          |                | GhGLU52A2 | Gh_A10G0736 | GbGLU52A2  | Gbscaffold51250.1.0  |         |                  |           |             | GbGLU52D2 | Gbscaffold16259.2.0  |
|          |                |           |             |            |                      |         |                  |           |             | GbGLU52D3 | Gbscaffold16259.5.0  |
| GaGLU53  | Cotton_A_25071 | GhGLU53A  | Gh_A10G0738 |            | Gbscaffold4636.5.0   | GrGLU53 | Gorai.011G114600 | GhGLU53D  | Gh_D10G1015 |           |                      |
| GaGLU54a | Cotton_A_23374 | GhGLU54aA | Gh_A10G1964 | GbGLU54aA1 | Gbscaffold16242.9.0  | GrGLU54 | Gorai.011G261000 | GhGLU54aD | Gh_D10G2246 | GbGLU54aD | Gbscaffold19666.7.0  |
|          |                |           |             | GbGLU54aA2 | Gbscaffold16242.10.0 |         |                  |           |             |           |                      |
| GaGLU54b | Cotton_A_23372 | GhGLU54bA | Gh_A10G1965 | GbGLU54bA  | Gbscaffold16242.11.0 |         |                  |           |             |           |                      |
| GaGLU55  | Cotton_A_13550 | GhGLU55A  | Gh_A10G2058 | GbGLU55A   | Gbscaffold20109.3.0  | GrGLU55 | Gorai.011G279200 | GhGLU55D  | Gh_D10G2470 | GbGLU55D  | Gbscaffold21303.10.0 |
| GaGLU56  | Cotton_A_02355 | GhGLU56A  | Gh_A11G0157 | GbGLU56A   | Gbscaffold9746.17.0  | GrGLU56 | Gorai.007G018900 | GhGLU56D  | Gh_D11G0171 | GbGLU56D  | Gbscaffold7684.25.0  |
| GaGLU57  | Cotton_A_15022 | GhGLU57A  | Gh_A11G2336 | GbGLU57A   | Gbscaffold16846.12.0 | GrGLU57 | Gorai.007G287700 | GhGLU57D  | Gh_D11G2650 | GbGLU57D  | Gbscaffold744.11.0   |
| GaGLU58  | Cotton_A_15376 | GhGLU58A  | Gh_A12G0700 | GbGLU58A   | Gbscaffold10231.1.0  | GrGLU58 | Gorai.008G082600 | GhGLU58D  | Gh_D12G0713 | GbGLU58D  | Gbscaffold317.1.0    |
| GaGLU59  | Cotton_A_37357 | GhGLU59A  | Gh_A12G0830 | GbGLU59A1  | Gbscaffold2804.3.0   | GrGLU59 | Gorai.008G101400 | GhGLU59D  | Gh_D12G0895 | GbGLU59D1 | Gbscaffold2008.13.0  |
|          |                |           |             | GbGLU59A2  | Gbscaffold2804.2.0   |         |                  |           |             | GbGLU59D2 | Gbscaffold2008.12.0  |
| GaGLU60  | Cotton_A_23048 | GhGLU60A  | Gh_A12G1321 | GbGLU60A   | Gbscaffold8011.12.0  | GrGLU60 | Gorai.008G159300 | GhGLU60D  | Gh_D12G1446 | GbGLU60D  | Gbscaffold2654.4.0   |
| GaGLU61  | Cotton_A_13195 | GhGLU61A  | Gh_A12G2182 |            |                      | GrGLU61 | Gorai.008G260000 | GhGLU61D  | Gh_D12G2362 |           |                      |
| GaGLU62  | Cotton_A_00968 | GhGLU62A  | Gh_A13G0160 | GbGLU62A   | Gbscaffold18390.7.0  | GrGLU62 | Gorai.013G019700 | GhGLU62D  | Gh_D13G0179 | GbGLU62D1 | Gbscaffold4634.26.0  |
|          |                |           |             |            |                      |         |                  |           |             | GbGLU62D2 | Gbscaffold4634.28.0  |
| GaGLU63  | Cotton_A_22413 | GhGLU63A  | Gh_A13G1509 | GbGLU63A   | Gbscaffold4625.17.0  | GrGLU63 | Gorai.013G202800 | GhGLU63D  | Gh_D13G1839 | GbGLU63D1 | Gbscaffold11306.7.0  |
|          |                |           |             |            |                      |         |                  |           |             | GbGLU63D2 | Gbscaffold11306.8.0  |
| GaGLU64  | Cotton_A_03187 | GhGLU64A  | Gh_A13G1667 | GbGLU64A   | Gbscaffold6297.3.0   | GrGLU64 | Gorai.013G221700 | GhGLU64D  | Gh_D13G2031 | GbGLU64D  | Gbscaffold15128.8.0  |
| GaGLU65  | Cotton_A_10553 | GhGLU65A  | Gh_A13G1979 | GbGLU65A   | Gbscaffold21181.8.0  | GrGLU65 | Gorai.013G263800 | GhGLU65D  | Gh_D13G2378 | GbGLU65D  | Gbscaffold17429.3.0  |
| GaGLU66  | Cotton_A_10484 | GhGLU66A  | Gh_A13G2048 | GbGLU66A   | Gbscaffold26646.15.0 | GrGLU66 | Gorai.013G270800 | GhGLU66D  | Gh_D13G2448 | GbGLU66D1 | Gbscaffold23517.6.0  |
|          |                |           |             |            |                      |         |                  |           |             | GbGLU66D2 | Gbscaffold23517.5.0  |
| GaGLU67  | Cotton_A_39233 | GhGLU67A  | Gh_A07G2231 | GbGLU67A   | Gbscaffold44.5.0     | GrGLU67 | Gorai.N004800    |           |             | GbGLU67D  | Gbscaffold3704.2.0   |

**Supplementary Table 2. Intra- or inter-species synteny of  $\beta$ -1,3-glucanase genes in *G. raimondii* and other species.**

| Subfamily | Gene name        | Locus name                   | 0.3<Ks<1.5*                             | Ks>1.5*                      | At                    | Tc                       | Vv                       |
|-----------|------------------|------------------------------|-----------------------------------------|------------------------------|-----------------------|--------------------------|--------------------------|
| <b>A</b>  | GrGLU56          | Gorai.007G018900             | Gorai.004G128800,Gorai.008G260000,GR.06 |                              | AT1G32860(1.764)      | Thecc1EG015614(0.621)    | GSVIVT01019678001(1.593) |
|           | GrGLU61          | Gorai.008G260000             | Gorai.004G128800,Gorai.007G018900,GR.06 | GR.04,GR.08                  | AT1G32860(2.223)      | Thecc1EG015614(0.555)    | GSVIVT01019678001(1.436) |
|           | GrGLU39          | Gorai.004G128800             | Gorai.007G018900,Gorai.008G260000,GR.06 | GR.08                        | AT1G32860(2.002)      | Thecc1EG015614(0.422)    | GSVIVT01019678001(1.329) |
|           | GrGLU14          | Gorai.009G085300             | Gorai.001G122300,GR.04,GR.06,GR.09      | GR.02                        | AT2G27500(1.852)      | Thecc1EG041403(0.468)    | GSVIVT01036124001(1.233) |
|           | GrGLU31          | Gorai.001G122300             | Gorai.009G085300,GR.02,GR.04,GR.06      |                              | AT2G27500(1.695)      | Thecc1EG041403(0.457)    | GSVIVT01036124001(1.417) |
|           | GrGLU15          | Gorai.009G154800             | Gorai.011G044700,GR.06,GR.10,GR.10      |                              | AT1G30080(1.890)      | Thecc1EG029478(0.433)    | GSVIVT01021499001(1.333) |
|           |                  |                              |                                         |                              | AT4G18340(1.791)      |                          |                          |
|           | GrGLU49          | Gorai.011G044700             | Gorai.009G154800,GR.10,GR.10,GR.06      |                              | AT1G30080(1.955)      | Thecc1EG029478(0.422)    | GSVIVT01021499001(1.381) |
|           |                  |                              |                                         |                              | AT4G18340(1.624)      |                          |                          |
|           | GrGLU24          | Gorai.010G062700             | Gorai.001G043100,GR.13,GR.09            | GR.09                        |                       | Thecc1EG038109(0.444)    | GSVIVT01015563001(1.200) |
| GrGLU30   | Gorai.001G043100 | Gorai.010G062700,GR.04,GR.09 | Gorai.011G084000                        |                              | Thecc1EG038109(0.415) | GSVIVT01015563001(1.025) |                          |
| GrGLU29   | Gorai.010G137300 |                              |                                         |                              |                       |                          |                          |
| GrGLU50   | Gorai.011G084000 | GR.10                        | Gorai.001G043100,GR.10                  | AT3G15800(1.859)             | Thecc1EG027171(0.556) | GSVIVT01017331001(1.227) |                          |
|           |                  |                              |                                         |                              | Thecc1EG038109(1.747) |                          |                          |
| GrGLU2    | Gorai.002G114200 | GR.05,GR.09                  |                                         |                              | Thecc1EG034422(0.431) | GSVIVT01013401001(1.232) |                          |
| <b>B</b>  | GrGLU33          | Gorai.001G216900             | GR.01,GR.04,GR.07                       | GR.09                        |                       | Thecc1EG002168(0.461)    | GSVIVT01030503001(1.362) |
|           |                  |                              |                                         |                              |                       |                          | GSVIVT01037711001(2.517) |
|           | GrGLU1           | Gorai.002G092600             | Gorai.009G442700,GR.13                  | GR.11,GR.07                  |                       | Thecc1EG030805(0.474)    | GSVIVT01037711001(1.325) |
| GrGLU19   | Gorai.009G442700 | Gorai.002G092600,GR.13       |                                         |                              | Thecc1EG030805(0.607) | GSVIVT01037711001(1.290) |                          |
| <b>C</b>  | GrGLU6           | Gorai.005G243100             | GR.13,GR.08                             | Gorai.009G202900             |                       | Thecc1EG006900(0.617)    | GSVIVT01009700001(2.146) |
|           |                  |                              |                                         |                              |                       | Thecc1EG034024(2.085)    | GSVIVT01031959001(1.259) |
|           | GrGLU44          | Gorai.006G090600             | GR.11,                                  |                              |                       |                          |                          |
|           | GrGLU17          | Gorai.009G202900             | GR.02,GR.05,GR.10,GR.09                 | Gorai.005G243100,GR.03,GR.08 |                       | Thecc1EG034024(0.448)    | GSVIVT01009700001(1.275) |
|           |                  |                              |                                         |                              |                       | Thecc1EG006900(1.364)    |                          |
| GrGLU10   | Gorai.009G010800 | GR.04                        |                                         |                              | Thecc1EG038357(0.457) |                          |                          |
| GrGLU54   | Gorai.011G261000 | GR.12                        | GR.13,GR.03,GR.06                       | AT3G55430(1.995)             |                       | GSVIVT01016553001(1.403) |                          |
|           |                  |                              |                                         |                              |                       | GSVIVT01024956001(1.869) |                          |

|          |         |                  |                                               |                               |                       |                          |
|----------|---------|------------------|-----------------------------------------------|-------------------------------|-----------------------|--------------------------|
|          | GrGLU65 | Gorai.013G263800 | GR.01,GR.13,GR.09                             | GR.11,GR.12,GR.03             | Thecc1EG041833(0.703) | GSVIVT01024956001(1.396) |
|          |         |                  |                                               |                               | Thecc1EG042768(1.692) |                          |
|          | GrGLU7  | Gorai.003G121900 | GR.08                                         |                               | Thecc1EG015448(0.526) | GSVIVT01038583001(1.747) |
|          | GrGLU38 | Gorai.004G111800 |                                               |                               |                       |                          |
|          | GrGLU47 | Gorai.006G202300 | GR.07,GR.08                                   |                               | Thecc1EG015448(0.496) | GSVIVT01038583001(1.096) |
| <b>D</b> | GrGLU26 | Gorai.010G078300 | Gorai.004G282300,Gorai.009G028200,GR.13       |                               | Thecc1EG037759(0.444) | GSVIVT01015282001(1.200) |
|          | GrGLU41 | Gorai.004G282300 | Gorai.009G028200,Gorai.010G078300,GR.01       |                               |                       | GSVIVT01015282001(1.595) |
|          | GrGLU11 | Gorai.009G028200 | Gorai.004G282300,Gorai.010G078300,GR.01,GR.13 | GR.03                         | Thecc1EG037759(0.457) | GSVIVT01015282001(1.197) |
|          | GrGLU12 | Gorai.009G028300 |                                               |                               | AT4G29360(1.877)      |                          |
|          |         |                  |                                               |                               | AT5G56590(1.796)      |                          |
|          | GrGLU28 | Gorai.010G126400 |                                               |                               |                       |                          |
|          | GrGLU36 | Gorai.004G094500 |                                               |                               |                       |                          |
|          | GrGLU16 | Gorai.009G179400 | GR.10,GR.11                                   |                               | AT1G11820(2.219)      |                          |
|          | GrGLU35 | Gorai.004G064200 |                                               |                               |                       | GSVIVT01030716001(1.136) |
|          | GrGLU32 | Gorai.001G204900 |                                               |                               |                       |                          |
|          | GrGLU3  | Gorai.002G174100 | Gorai.005G159100,GR.08                        |                               |                       | GSVIVT01011682001(1.440) |
|          | GrGLU5  | Gorai.005G159100 | Gorai.002G174100,GR.12,GR.08                  |                               |                       | GSVIVT01011682001(0.962) |
|          |         |                  |                                               |                               |                       | GSVIVT01030716001(1.820) |
| <b>E</b> | GrGLU18 | Gorai.009G242500 | GR.05,GR.10,GR.09                             |                               |                       |                          |
|          | GrGLU40 | Gorai.004G257700 | GR.03,GR.13                                   |                               |                       |                          |
|          | GrGLU13 | Gorai.009G074100 | GR.06                                         |                               |                       |                          |
|          | GrGLU42 | Gorai.006G079400 | GR.11,GR.06                                   |                               |                       |                          |
|          | GrGLU43 | Gorai.006G079600 |                                               |                               |                       |                          |
|          | GrGLU21 | Gorai.010G003500 | GR.02,GR.05,GR.09,GR.09                       | GR.03,GR.05,GR.07,GR.08,GR.08 |                       |                          |
|          | GrGLU20 | Gorai.010G003400 |                                               |                               |                       |                          |
|          | GrGLU23 | Gorai.010G003700 |                                               |                               |                       |                          |
|          | GrGLU22 | Gorai.010G003600 |                                               |                               |                       |                          |
|          | GrGLU45 | Gorai.006G134600 |                                               |                               |                       |                          |
|          | GrGLU46 | Gorai.006G134700 |                                               |                               |                       |                          |
|          | GrGLU60 | Gorai.008G159300 | GR.05,GR.12,GR.09                             |                               |                       |                          |
| <b>F</b> | GrGLU57 | Gorai.007G287700 | Gorai.013G202800,GR.04,GR.13                  |                               |                       |                          |

|          |         |                  |                                    |             |                  |                       |                          |
|----------|---------|------------------|------------------------------------|-------------|------------------|-----------------------|--------------------------|
|          | GrGLU63 | Gorai.013G202800 | Gorai.007G287700,GR.13,GR.04       |             |                  |                       |                          |
|          | GrGLU59 | Gorai.008G101400 | GR.03                              |             |                  |                       |                          |
|          | GrGLU51 | Gorai.011G114400 | GR.07                              |             |                  |                       |                          |
|          | GrGLU53 | Gorai.011G114600 |                                    |             |                  |                       |                          |
|          | GrGLU52 | Gorai.011G114500 |                                    |             |                  |                       |                          |
|          | GrGLU25 | Gorai.010G068800 | GR.04,GR.01,GR.09                  | GR.09       |                  | Thecc1EG037932(0.444) |                          |
|          | GrGLU27 | Gorai.010G094500 | GR.01                              |             |                  |                       |                          |
|          | GrGLU64 | Gorai.013G221700 | GR.01,GR.10,GR.04,GR.09            |             |                  |                       |                          |
|          | GrGLU37 | Gorai.004G097500 |                                    |             |                  |                       |                          |
|          | GrGLU8  | Gorai.012G009200 |                                    |             |                  |                       |                          |
|          | GrGLU9  | Gorai.012G043900 |                                    |             |                  |                       |                          |
|          | GrGLU66 | Gorai.013G270800 | GR.03,GR.09                        |             | AT5G58480(2.050) |                       |                          |
| <b>G</b> | GrGLU67 | Gorai.N004800    | Gorai.001G230200,GR.07             |             |                  |                       |                          |
|          | GrGLU34 | Gorai.001G230200 | Gorai.N004800,GR.01,GR.07          |             | AT3G07320(2.257) | Thecc1EG002746(0.461) |                          |
|          | GrGLU4  | Gorai.005G026800 | Gorai.006G224700,GR.11             |             | AT3G23770(2.098) | Thecc1EG020208(0.615) |                          |
|          |         |                  |                                    |             | AT4G14080(1.833) |                       |                          |
|          | GrGLU48 | Gorai.006G224700 | Gorai.005G026800,GR.11             |             | AT3G23770(1.928) | Thecc1EG020208(0.536) |                          |
|          |         |                  |                                    |             | AT4G14080(1.965) |                       |                          |
| <b>H</b> | GrGLU62 | Gorai.013G019700 | Gorai.011G279200,GR.12,GR.09,GR.10 | GR.06,GR.07 | AT3G55780(1.802) | Thecc1EG042611(0.551) | GSVIVT01016379001(1.511) |
|          | GrGLU55 | Gorai.011G279200 | Gorai.013G019700,GR.10,GR.12       |             |                  | Thecc1EG042611(0.650) | GSVIVT01016379001(1.639) |

\* Ks values of gene pairs in syntenic blocks; and the chromosome No. indicated that homologous blocks can be found between two chromosomes, but the paralog genes was lost.



**Supplementary Table 3. Expression clusters of  $\beta$ -1,3-glucanase genes in *G. hirsutum*.**

| Cluster I | Cluster II | Cluster III | Cluster IV | Cluster V | Cluster VI | Cluster VII | Cluster VIII |
|-----------|------------|-------------|------------|-----------|------------|-------------|--------------|
| GhGLU19D  | GhGLU12D   | GhGLU30A    | GhGLU65A   | GhGLU45A  | GhGLU1A    | GhGLU49A    | GhGLU39D     |
| GhGLU28D  | GhGLU21D   | GhGLU31A    | GhGLU65D   | GhGLU45D  | GhGLU1D    | GhGLU18A    | GhGLU44A     |
| GhGLU36A  | GhGLU22D   | GhGLU31D    | GhGLU15A   | GhGLU54bA | GhGLU39A   | GhGLU18D    | GhGLU40D     |
| GhGLU36D  | GhGLU46A   | GhGLU21A    | GhGLU50D   | GhGLU54aD | GhGLU30D   |             |              |
| GhGLU10D  | GhGLU46D   |             | GhGLU50A   | GhGLU51D  | GhGLU19A   |             |              |
| GhGLU5D   | GhGLU12A   |             | GhGLU27D   | GhGLU59D  | GhGLU34A   |             |              |
| GhGLU5A   | GhGLU42A   |             | GhGLU61A   | GhGLU53D  | GhGLU56A   |             |              |
| GhGLU37A  | GhGLU42D   |             | GhGLU61D   | GhGLU51A  | GhGLU10A   |             |              |
| GhGLU37D  | GhGLU43A   |             | GhGLU17D   | GhGLU54aA | GhGLU56D   |             |              |
| GhGLU2A   | GhGLU43D   |             | GhGLU17A   | GhGLU53A  | GhGLU34D   |             |              |
| GhGLU2D   |            |             | GhGLU64A   | GhGLU52D  |            |             |              |
| GhGLU33A  |            |             | GhGLU64D   |           |            |             |              |
| GhGLU33D  |            |             | GhGLU27A   |           |            |             |              |
| GhGLU35A  |            |             | GhGLU57A   |           |            |             |              |
| GhGLU35D  |            |             | GhGLU57D   |           |            |             |              |
| GhGLU16A  |            |             |            |           |            |             |              |
| GhGLU16D  |            |             |            |           |            |             |              |
| GhGLU41A  |            |             |            |           |            |             |              |
| GhGLU41D  |            |             |            |           |            |             |              |
| GhGLU26A  |            |             |            |           |            |             |              |
| GhGLU26D  |            |             |            |           |            |             |              |
| GhGLU28A  |            |             |            |           |            |             |              |
| GhGLU8A   |            |             |            |           |            |             |              |
| GhGLU8D   |            |             |            |           |            |             |              |
| GhGLU3A   |            |             |            |           |            |             |              |
| GhGLU3D   |            |             |            |           |            |             |              |
| GhGLU25D  |            |             |            |           |            |             |              |
| GhGLU9A   |            |             |            |           |            |             |              |
| GhGLU24A  |            |             |            |           |            |             |              |
| GhGLU32A  |            |             |            |           |            |             |              |
| GhGLU32D  |            |             |            |           |            |             |              |
| GhGLU66D  |            |             |            |           |            |             |              |
| GhGLU66A  |            |             |            |           |            |             |              |
| GhGLU24D  |            |             |            |           |            |             |              |
| GhGLU9D   |            |             |            |           |            |             |              |
| GhGLU63D  |            |             |            |           |            |             |              |
| GhGLU63A  |            |             |            |           |            |             |              |
| GhGLU67A  |            |             |            |           |            |             |              |
| 38 Genes  | 10 Genes   | 4 Genes     | 15 Genes   | 11 Genes  | 10 Genes   | 3 Genes     | 3 Genes      |

**Supplementary Table 4. Percentage of wilted leaves after *V. dahlia* inoculation.**

| Treatment         | Days after <i>V. dahlia</i> inoculation |            |            |            |            |            |
|-------------------|-----------------------------------------|------------|------------|------------|------------|------------|
|                   | 11                                      | 15         | 20         | 25         | 30         | 35         |
| <b>JUN 1</b>      | 20.7±0.6 a                              | 47.1±2.7 a | 70.6±4.9 a | 82.8±4.5 a | 96.2±1.0 a | 100±0.0 a  |
| <b>TRV2:GLU43</b> | 14.5±1.5 b                              | 34.5±1.5 b | 56.1±3.0 b | 65.9±3.6 b | 83.0±9.7 b | 97.8±3.9 a |
| <b>TRV2:GLU42</b> | 11.5±1.7 c                              | 28.7±5.5 b | 49.4±4.9 b | 60.3±3.8 b | 83.3±3.8 b | 96.2±3.9 a |
| <b>TRV:00</b>     | 0.0±0.0 d                               | 20.4±2.8 c | 28.3±2.8 c | 40.1±4.1 c | 56.6±6.1 c | 60.3±2.3 b |
| <b>CK</b>         | 0.0±0.0 d                               | 10.1±3.1 d | 25.1±1.2 c | 36.0±2.5 c | 50.5±3.8 c | 57.1±1.2 b |

The experiments were repeated three times. Each independent experiment with 20 cotton plants was performed and an average value of “percentage of wilted leaves” was calculated. Standard deviation reflects the differences among the three independent biological experiments. Different letters indicate the significant difference among different treatments (Tukey’s multiple comparison test,  $P < 0.05$ ).

**Supplementary Table 5. Oligonucleotide primers used in this study.**

| Gene     | Forward (5'-3')                | Reverse (5'-3')                       | Purpose                                            |
|----------|--------------------------------|---------------------------------------|----------------------------------------------------|
| GLU33    | ATTTCCGACGGGATACTGAAAGAG       | CACAAAGGAAGTAAGTTGCTAACA              | qRT-PCR expression analysis                        |
| GLU2     | ACATGCCGGTATCGACAACAG          | CATTAACCCAAACTCTTTCC                  | qRT-PCR expression analysis                        |
| GLU41    | GATCGCTGTTATCTTGAACCTG         | GAAAATACATCCATGGCTTACATT              | qRT-PCR expression analysis                        |
| GLU3     | GCGCTTTCCTTATGACTGCT           | CAATAGGAGAAACAAAATTGGGTT              | qRT-PCR expression analysis                        |
| GLU35    | GTTTCACTGGCATTITTAGTGTGA       | CCGGTTCCTCCATCTTTGTAC                 | qRT-PCR expression analysis                        |
| GLU26    | TAAACCCCGAAAAGGTGTTGGAT        | AGCAAGTTCTTCCCCACCGCAAAT              | qRT-PCR expression analysis                        |
| GLU37    | TTCTGTTCTTCTCCTCCTATTGC        | TTCACAGTTTGCCTTATAGATAGC              | qRT-PCR expression analysis                        |
| GLU16    | TTGCATTGAATTCAAGATGATCTC       | CGCATTCAATCAACGACTCA                  | qRT-PCR expression analysis                        |
| GLU28    | CGATATGTAATCTCAGCCGCTTGT       | GGCTTTGCTCGCGGATTTCC                  | qRT-PCR expression analysis                        |
| GLU24    | GGGCTTCATTCAAGTTGATG           | CCTAAAGATCCAAAATCAGGTATG              | qRT-PCR expression analysis                        |
| GLU66    | TATTGGGTTTCACATGGTAGAGA        | AACTGAAAACCAGCAACTAACAGA              | qRT-PCR expression analysis                        |
| GLU43    | AGGCATTGGGATATTGCTTCTAAG       | AAAAGACAAAACCTCCCAAATTC               | qRT-PCR expression analysis                        |
| GLU42    | GAGTTAGAGAGACACTTTGGGTTG       | AAAAGACCAAATTTCCCAGGCTT               | qRT-PCR expression analysis                        |
| GLU21    | CAAACAGGAGAAATACCCAATTAG       | CTGGAATTACAATAATCAGACCAC              | qRT-PCR expression analysis                        |
| GLU22    | GTTTTTCCCAAATAAACAGGAGAA       | ATACCCGAGACTGAGAGAAATGGC              | qRT-PCR expression analysis                        |
| GLU45    | CCAAATAGGCAGCCTAAATACCAA       | TTCCTAGGGAGAAGTGATACGCTC              | qRT-PCR expression analysis                        |
| GLU59    | CCATGTCCTGCAGATTCAATACTC       | CCAAACTCATTTTATGGAATGGTG              | qRT-PCR expression analysis                        |
| GLU17    | GGAGTACATGAAAAAGGAGAGTAG       | GCCAATCACTCAATACCATTAC                | qRT-PCR expression analysis                        |
| GLU65    | AACTATTCAGTGAATCAAGGGTCA       | AAAAACCTAACTAGGCCACTTACA              | qRT-PCR expression analysis                        |
| GLU63    | CAAGGTTTGGCTATAATTACAACA       | AGGGACTTACTGAAGTAAAAGAAG              | qRT-PCR expression analysis                        |
| GLU30    | ATCCAGTTGGTCTGGCTCCTACTC       | AAATGCAAGTGCAGAACAGAATGA              | qRT-PCR expression analysis                        |
| GLU9     | AGGTGGGTTGTCGGCTGTA            | GATACTATCAGCTTCATACGAGGG              | qRT-PCR expression analysis                        |
| GLU18    | CCAATATGAACCCTGTTTATCCA        | TGCAGAACTATATGAAGCGTCTC               | qRT-PCR expression analysis                        |
| GLU19    | TATCAGAAGAACACACGTGCG          | TTTTCCCCTTTGTTTTTCCAC                 | qRT-PCR expression analysis                        |
| GLU1     | CTGTCAATTTCCCACAGGATA          | ATTACAACCCTCATCCTTGTC                 | qRT-PCR expression analysis                        |
| GLU34    | ATTTTAACGGCTTGGCTACCCAGA       | TATTCGATTTCGTGATTGGGTATCC             | qRT-PCR expression analysis                        |
| GLU42    | CGCGGATCCATTCGATGCAATGTTGGATC  | <u>CGAGCTC</u> AGCAATATCCCAATGCCTTCC  | VIGS analysis (underlined BamHI/SacI enzyme sites) |
| GLU43    | CGCGGATCCTATATGGGATCAAGGACGTGG | <u>CGAGCTC</u> ATTTTGGTTGCTTGTGTTGGTG | VIGS analysis (underlined BamHI/SacI enzyme sites) |
| histone3 | GAAGCCTCATCGATACCGTC           | CTACCACTACCATCATGG                    | Reference gene for qRT-PCR analysis                |
